# Supplementary material for: The allosteric mechanism of mTOR activation can inform bitopic inhibitor optimization
Source: Royal Society of Chemistry journal article supplement (doi:10.1039/d3sc04690g), 2023-12-07
Supplement: d3sc04690g2.pdf [file d3sc04690g2.pdf]

## The allosteric mechanism of mTOR activation can inform bitopic inhibitor optimization

Yonglan Liu<sup>a</sup>, Mingzhen Zhang<sup>b</sup>, Hyunbum Jang<sup>b</sup> and Ruth Nussinov<sup>b,c\*</sup>

<sup>a</sup>Cancer Innovation Laboratory, National Cancer Institute, Frederick, MD 21702, U.S.A.

<sup>b</sup>Computational Structural Biology Section, Frederick National Laboratory for Cancer Research,  
Frederick, MD 21702, U.S.A.

<sup>c</sup>Department of Human Molecular Genetics and Biochemistry, Sackler School of Medicine, Tel  
Aviv University, Tel Aviv 69978, Israel

Author for correspondence:

Tel: 301-846-5579

E-mail: [NussinoR@mail.nih.gov](mailto:NussinoR@mail.nih.gov)

The authors declare no potential conflicts of interest.

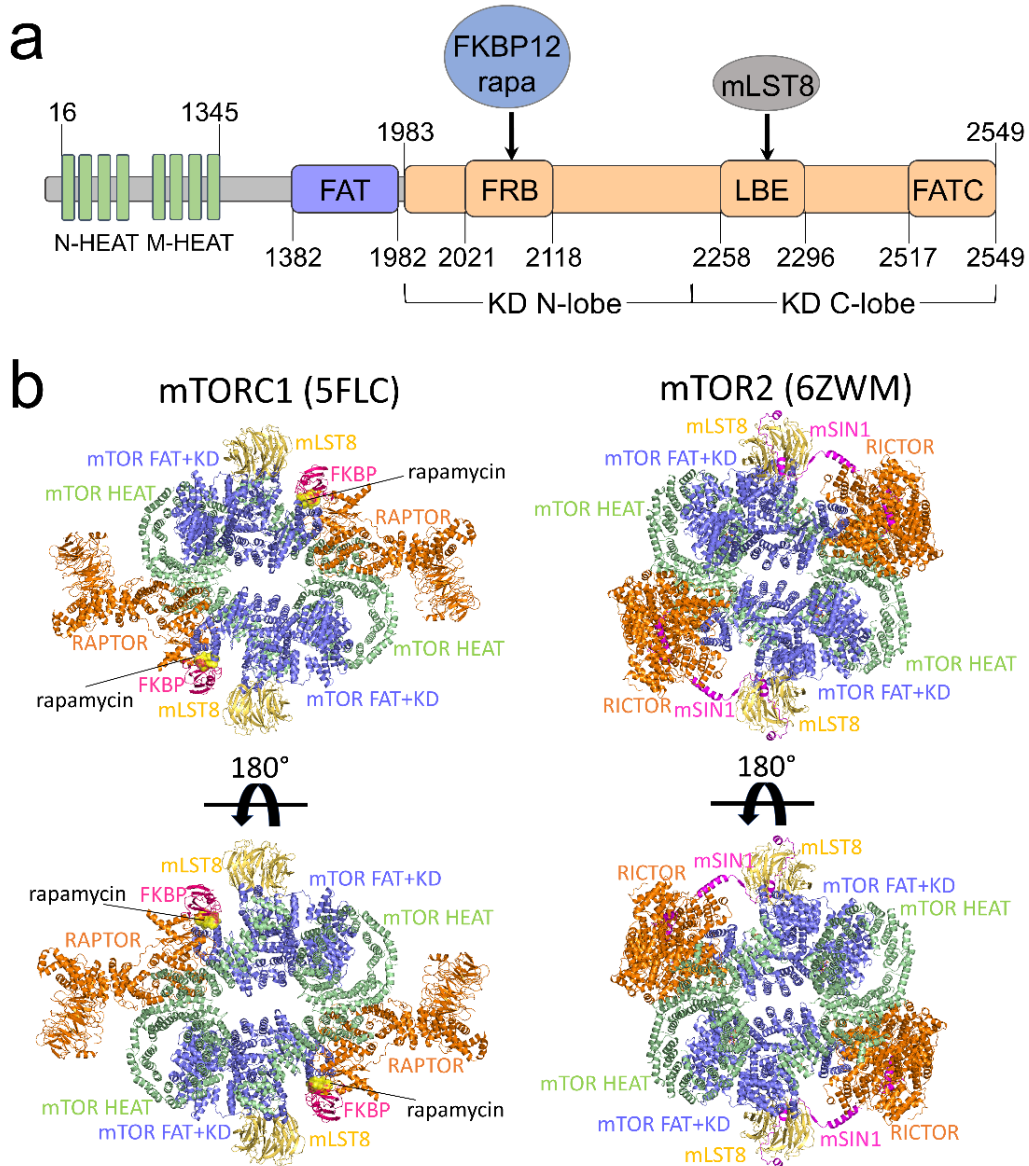

**Fig. S1.** (a) Domains of mTOR. It consists of the N-terminal HEAT repeats (residues 16-1345) including N-HEAT and M-HEAT, and the C-terminal FAT (residues 1382-1982) and the kinase (residues 1983-2549) domains. The kinase domain has three inserted domains, the FKBP12-*rapamycin*-binding (FRB, residues 2021-2118), Lst8 binding element (LBE, residues 2258-2296), and FAT C-terminal (FATC, residues 2517-2549) domains. The FRB and LBE domains are responsible for the binding of *rapamycin*-FKBP12 and mLST8, respectively. (b) The cryo-EM structures of mTORC1 (*left*, PDB ID: 5FLC) and mTORC2 (*right*, PDB ID: 6ZWM).

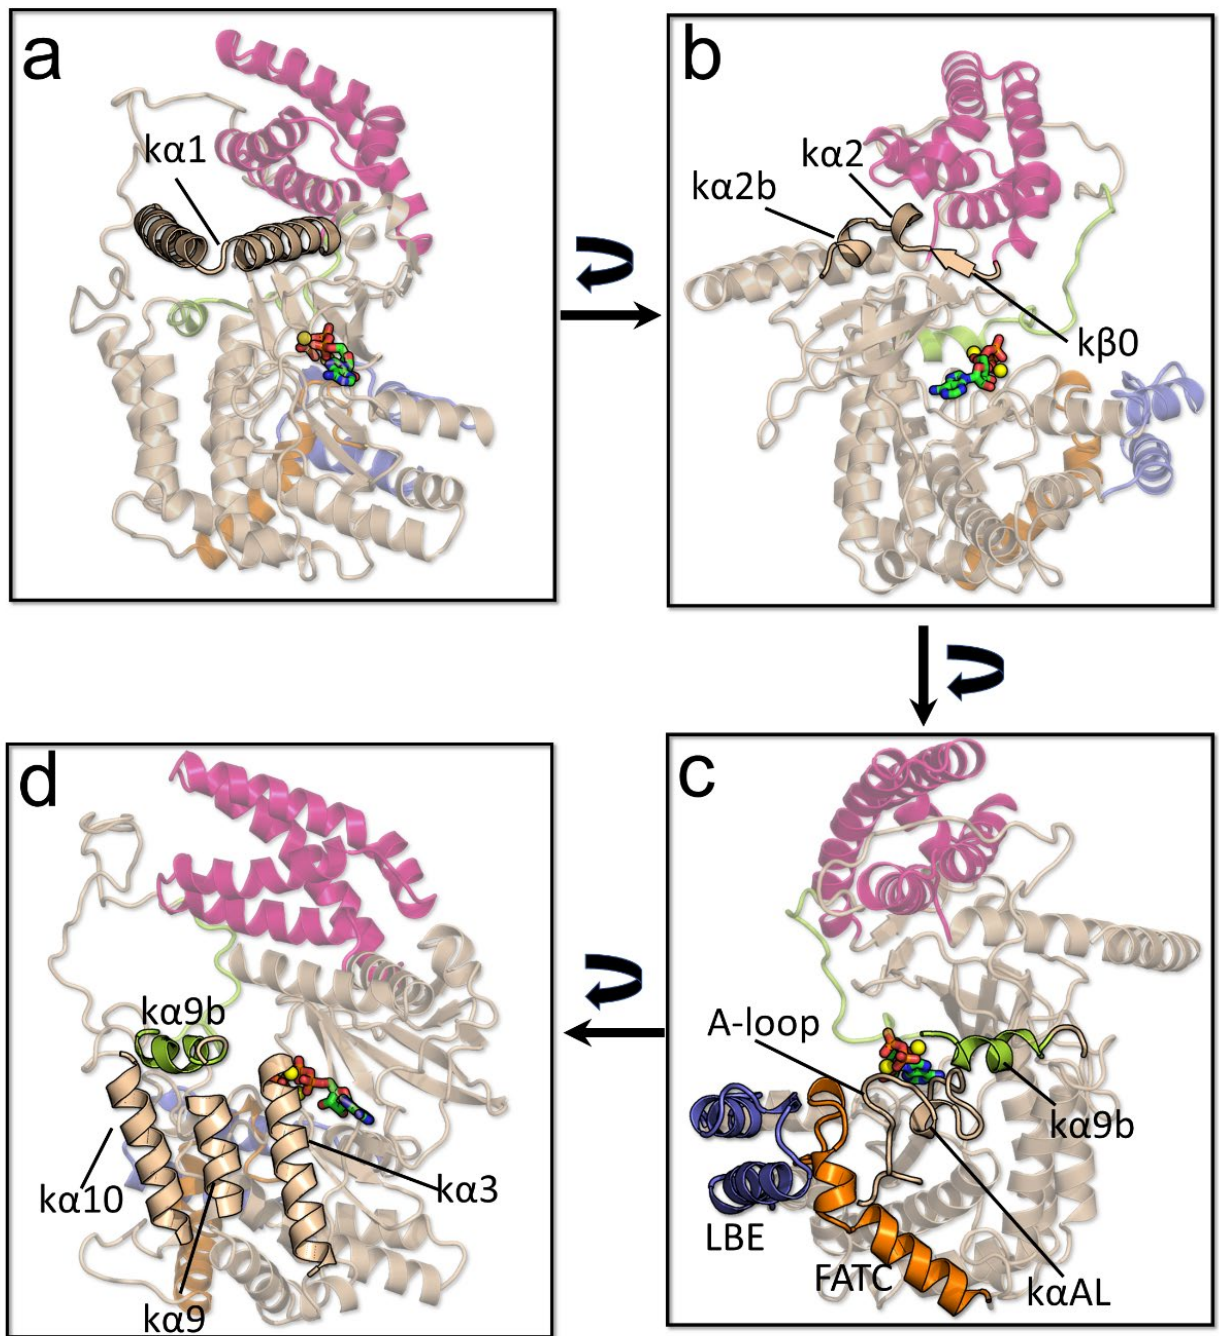

**Fig. S2.** Structural details of the mTOR kinase domain with highlights of (a) the  $k\alpha 1$ -helix, (b) the  $k\alpha 2$ -helix, the  $k\alpha 2b$ -helix, and the  $k\beta 0$ -strand, (c) the A-loop, the  $k\alpha 9b$ -helix, and the LBE and FATC domains, and (d) the  $k\alpha 3$ -helix, the  $k\alpha 9$ -helix, the  $k\alpha 9b$ -helix, and the  $k\alpha 10$ -helix.

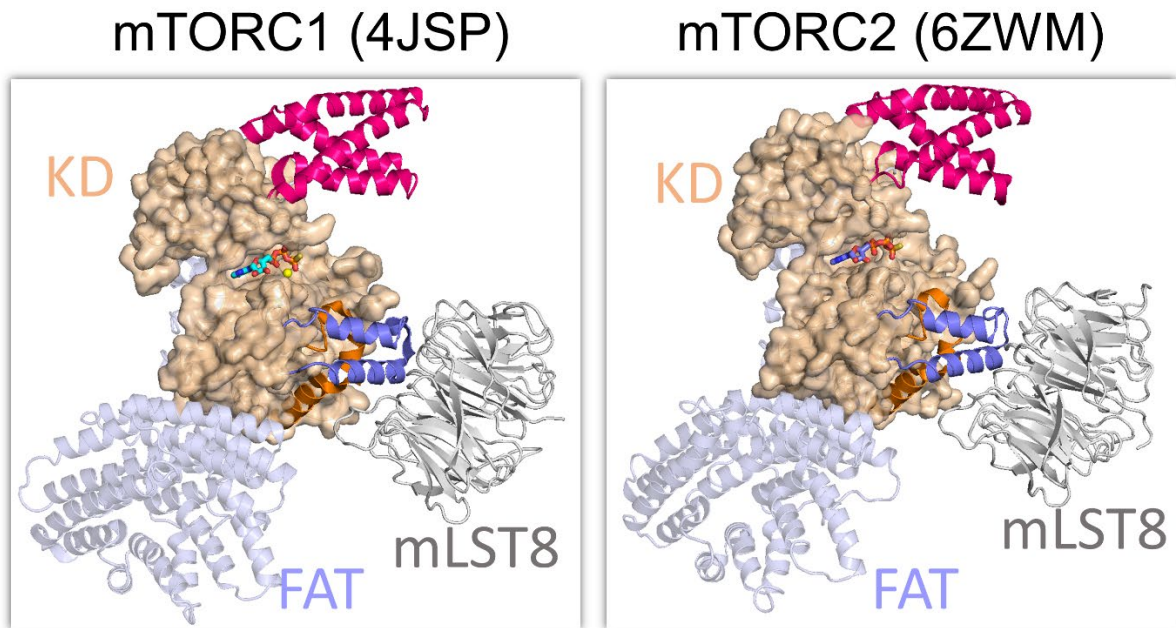

**Fig. S3.** Binding poses between mTOR and mLST8 of mTORC1 (*left*), and mTORC2 (*right*).

These conformations are extracted from the crystal structures.

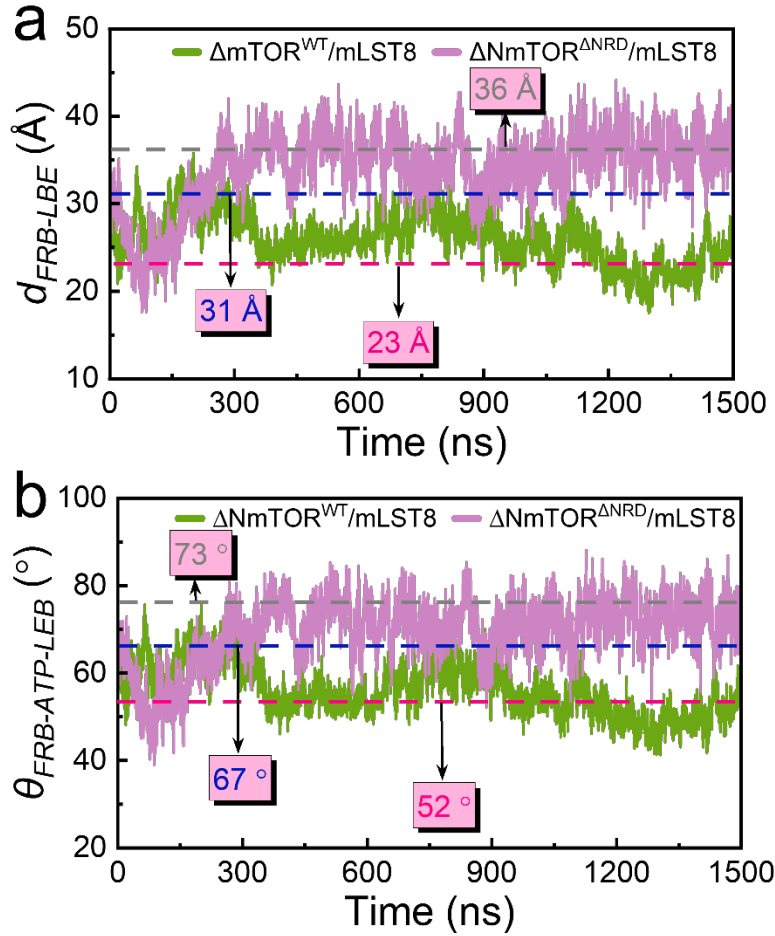

**Fig. S4.** Time-dependent (a) distances of FRB-LBE ( $d_{FRB-LBE}$ ), and (b) angles of FRB-ATP-LBE ( $\theta_{FRB-ATP-LBE}$ ).  $d_{FRB-LBE}$  is the distance between the C $\alpha$  atom of residue M2039 in the FRB domain and the C $\alpha$  atom of residue M2277 in the LBE domain.  $\theta_{FRB-ATP-LBE}$  is the angle between the vector from the phosphorus atom of the  $\gamma$ -phosphate of ATP to the C $\alpha$  atom of residue M2039 in the FRB domain and the vector from the phosphorus atom of the  $\gamma$ -phosphate of ATP to the C $\alpha$  atom of residue M2277 in the LBE domain.  $d_{FRB-LBE}$  and  $\theta_{FRB-ATP-LBE}$  in the crystal structure of  $\Delta NmTOR/mLST8$  ( $\sim 31$  Å and  $\sim 67^\circ$ , blue dash lines) are marked out in (a) and (b), respectively.  $d_{FRB-LBE}$  and  $\theta_{FRB-ATP-LBE}$  that the simulated systems of  $\Delta NmTOR^{WT}/mLST8$  ( $\sim 23$  Å and  $\sim 52^\circ$ , hot-pink dash lines) and  $\Delta NmTOR^{\Delta NRD}/mLST8$  ( $\sim 36$  Å and  $\sim 73^\circ$ , gray dash lines) populate are also highlighted in (a) and (b), respectively.

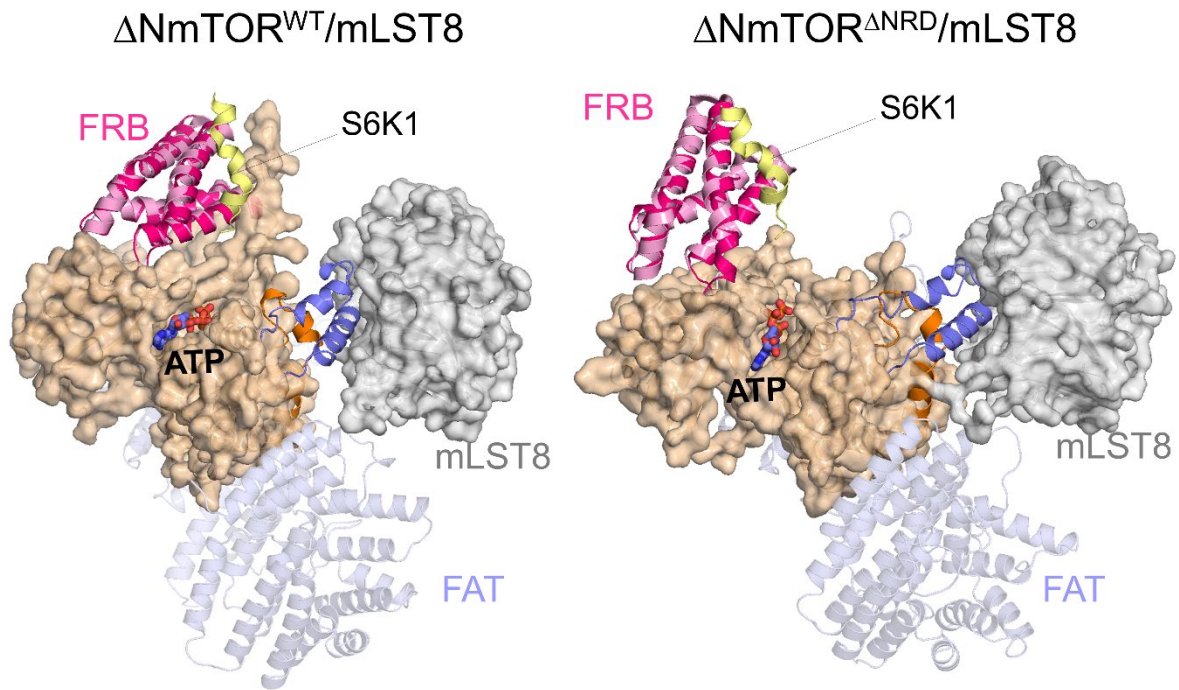

**Fig. S5.** Snapshots to present the binding of a mTORC1 substrate (S6K1) and the FRB domain of mTOR in  $\Delta NmTOR^{WT}/mLST8$  and  $\Delta NmTOR^{\Delta NRD}/mLST8$ . The binding poses between the substrate and FRB is through aligning the crystal structure of the FRB/S6K1 complex (PDB ID: 5WBH) to the final configurations of the mTOR FRB domain.

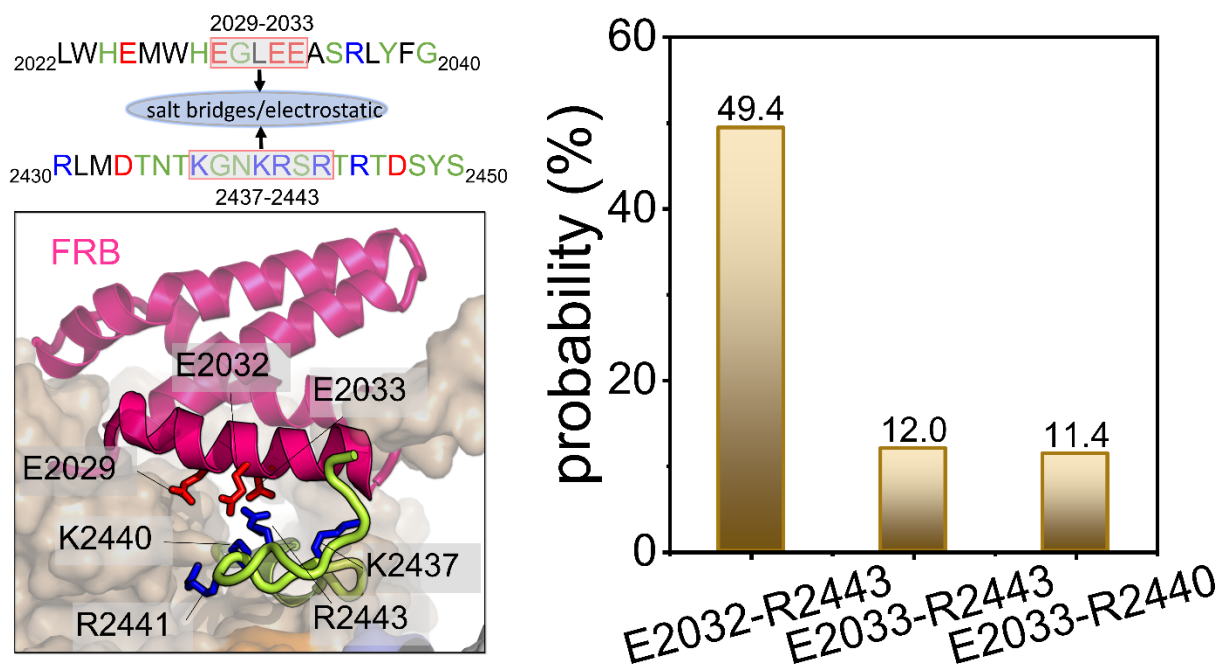

**Fig. S6.** A snapshot representing the interaction between NRD (residues 2430-2450) and the FRB helix (residues 2022-2040), and the probability of the salt bridges (E2032-R2443, E2033-R2443, and E2033-R2440) formed between some positive charged residues in NRD and negative charged residues (E2032 and E2033) in the FRB helix for the  $\Delta$ NmTOR<sup>WT</sup>/mLST8 system. Data in the probability were extracted from the last 500-ns trajectories.

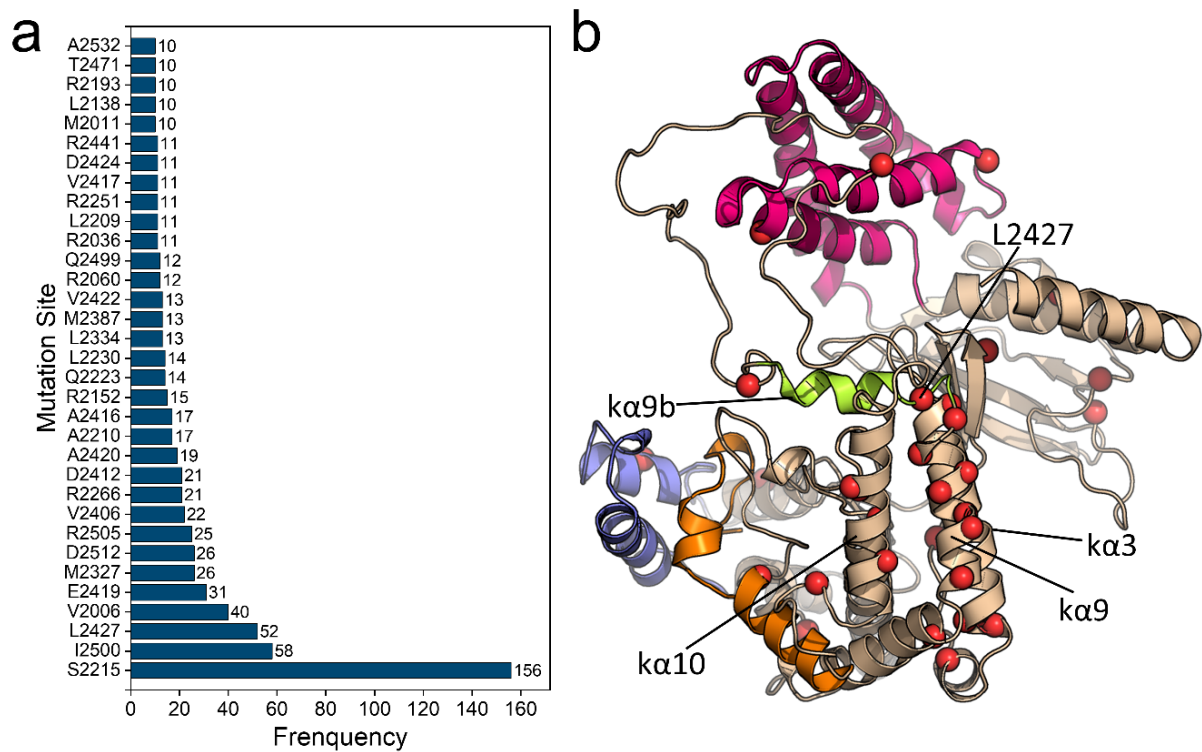

**Fig. S7.** (a) Statistics of mTOR-activating mutations in the kinase domain with frequency  $\geq 10$ . (b) These mutations are mapped to the structure of the mTOR kinase domain. The statistical data in (a) was extracted from the combination of the TCGA, GENIE, and COSMIC databases. Helices  $k\alpha 3$ ,  $k\alpha 9$ ,  $k\alpha 9b$ , and  $k\alpha 10$ , as well as the L2427 residue, are marked out.



**Table S1.** Details of simulation systems.

| system name                                          | components                                            | mTOR mutation      | No. of parallel trajectories | simulation time |
|------------------------------------------------------|-------------------------------------------------------|--------------------|------------------------------|-----------------|
| $\Delta\text{NmTOR}^{\text{WT}}/\text{mLST8}$        | $\Delta\text{NmTOR}$ , mLST8, ATP, 2 $\text{Mg}^{2+}$ | /                  | 3                            | 1500 ns         |
| $\Delta\text{NmTOR}^{\Delta\text{NRD}}/\text{mLST8}$ | $\Delta\text{NmTOR}$ , mLST8, ATP, 2 $\text{Mg}^{2+}$ | 2430-2450 deletion | 3                            | 1500 ns         |
| $\Delta\text{NmTOR}^{\text{L2427R}}/\text{mLST8}$    | $\Delta\text{NmTOR}$ , mLST8, ATP, 2 $\text{Mg}^{2+}$ | L2427R mutation    | 3                            | 1500 ns         |
